# Supplementary material
Source: PubMed Central journal article supplement (PMC4706596)
Supplement: supp_ptj.20150090_2015-0090.pdf [file supp_ptj.20150090_2015-0090.pdf]

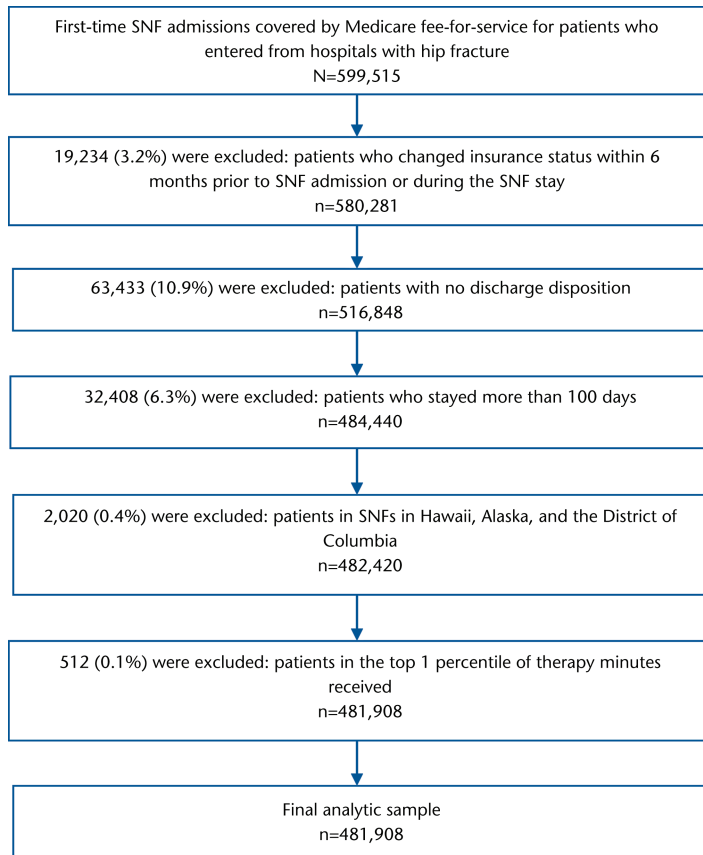

**eFigure.**  
Flow diagram of the study sample. SNF=skilled nursing facility.

**eTable 1.**  
Total Therapy Minutes per Week Provided to Beneficiaries of Medicare Fee-for-Service in SNFs After Hip Fracture<sup>a</sup>

| Year | Total (OT+PT+ST) |           |     |        | OT     |           |     |        | PT     |           |     |        |
|------|------------------|-----------|-----|--------|--------|-----------|-----|--------|--------|-----------|-----|--------|
|      | n                | $\bar{X}$ | SD  | Median | n      | $\bar{X}$ | SD  | Median | n      | $\bar{X}$ | SD  | Median |
| 2000 | 55,551           | 379       | 176 | 360    | 55,555 | 151       | 95  | 150    | 55,553 | 219       | 102 | 210    |
| 2001 | 54,820           | 374       | 176 | 356    | 54,823 | 152       | 93  | 150    | 54,823 | 212       | 101 | 203    |
| 2002 | 53,137           | 382       | 181 | 368    | 53,151 | 159       | 94  | 158    | 53,150 | 213       | 101 | 205    |
| 2003 | 50,946           | 401       | 183 | 393    | 50,978 | 170       | 95  | 169    | 50,981 | 219       | 101 | 215    |
| 2004 | 49,745           | 422       | 188 | 427    | 49,819 | 181       | 96  | 183    | 49,822 | 226       | 103 | 225    |
| 2005 | 47,514           | 445       | 194 | 465    | 47,578 | 193       | 98  | 199    | 47,596 | 235       | 104 | 238    |
| 2006 | 45,392           | 475       | 199 | 503    | 45,445 | 207       | 100 | 216    | 45,466 | 246       | 106 | 250    |
| 2007 | 44,264           | 507       | 204 | 522    | 44,325 | 222       | 102 | 235    | 44,332 | 261       | 108 | 262    |
| 2008 | 43,377           | 541       | 203 | 555    | 43,432 | 237       | 102 | 250    | 43,438 | 275       | 108 | 276    |
| 2009 | 36,657           | 575       | 197 | 623    | 36,707 | 251       | 100 | 262    | 36,712 | 290       | 106 | 295    |

<sup>a</sup> SNFs=skilled nursing facilities, OT=occupational therapy, PT=physical therapy, ST=speech and language therapy.

## Therapy in SNFs for Patients With Hip Fracture

**eTable 2.**

Case Mix for Beneficiaries of Medicare Fee-for-Service Who Were Admitted to SNFs After Hip Fracture<sup>a</sup>

| Year | ADL    |           |     |        | CPS    |           |     |        | Length of Stay (d) |           |    |        | Discharged to Home (%) |           |      |
|------|--------|-----------|-----|--------|--------|-----------|-----|--------|--------------------|-----------|----|--------|------------------------|-----------|------|
|      | n      | $\bar{X}$ | SD  | Median | n      | $\bar{X}$ | SD  | Median | n                  | $\bar{X}$ | SD | Median | n                      | $\bar{X}$ | SD   |
| 2000 | 55,532 | 16.7      | 5.0 | 17.0   | 55,432 | 1.3       | 1.6 | 1.0    | 55,556             | 27        | 20 | 21     | 55,556                 | 0.71      | 0.45 |
| 2001 | 54,800 | 16.9      | 4.9 | 17.0   | 54,738 | 1.3       | 1.6 | 1.0    | 54,826             | 29        | 21 | 22     | 54,826                 | 0.72      | 0.45 |
| 2002 | 53,130 | 17.3      | 4.9 | 18.0   | 53,037 | 1.4       | 1.6 | 1.0    | 53,155             | 30        | 22 | 23     | 53,155                 | 0.71      | 0.45 |
| 2003 | 50,966 | 17.4      | 4.8 | 18.0   | 50,882 | 1.4       | 1.6 | 1.0    | 50,985             | 32        | 22 | 26     | 50,985                 | 0.72      | 0.45 |
| 2004 | 49,786 | 17.6      | 4.6 | 18.0   | 49,721 | 1.4       | 1.6 | 1.0    | 49,828             | 33        | 23 | 27     | 49,828                 | 0.74      | 0.44 |
| 2005 | 47,569 | 17.7      | 4.5 | 18.0   | 47,496 | 1.3       | 1.6 | 1.0    | 47,599             | 34        | 23 | 28     | 47,599                 | 0.74      | 0.44 |
| 2006 | 45,448 | 18.0      | 4.3 | 18.0   | 45,351 | 1.3       | 1.6 | 1.0    | 45,471             | 35        | 23 | 29     | 45,471                 | 0.75      | 0.43 |
| 2007 | 44,310 | 18.1      | 4.2 | 18.0   | 44,214 | 1.3       | 1.5 | 1.0    | 44,334             | 35        | 23 | 29     | 44,334                 | 0.77      | 0.42 |
| 2008 | 43,414 | 18.2      | 4.0 | 18.0   | 43,280 | 1.3       | 1.5 | 1.0    | 43,438             | 36        | 23 | 30     | 43,438                 | 0.77      | 0.42 |
| 2009 | 36,690 | 18.3      | 3.8 | 18.0   | 36,580 | 1.3       | 1.5 | 1.0    | 36,716             | 35        | 22 | 29     | 36,716                 | 0.79      | 0.41 |

<sup>a</sup> As measured by activities of daily living (ADL), scored on a scale from 0 to 28 points, with higher scores indicating greater disability; the Cognitive Performance Scale (CPS), scored on a scale from 0 to 6 points, with higher scores indicating more severe impairment; length of stay, and the proportion discharged to home. SNFs=skilled nursing facilities.

**eTable 3.** Adjusted Association Between Quantity of Therapy and Likelihood of Discharge to Home in Beneficiaries of Medicare Fee-for-Service Who Were Admitted to SNFs After Hip Fracture<sup>a</sup>

| Independent Variables                | Dependent Variable=Discharged to Home   |                                         |                                         |                                         |                                         |                                         |                                         |                                         |
|--------------------------------------|-----------------------------------------|-----------------------------------------|-----------------------------------------|-----------------------------------------|-----------------------------------------|-----------------------------------------|-----------------------------------------|-----------------------------------------|
|                                      | Whole Sample                            | OT                                      | PT                                      | Low                                     | Medium                                  | High                                    | Very High                               | Ultrahigh                               |
| Additional hours of therapy per week | 0.031 <sup>b</sup><br>(0.030, 0.031)    | 0.053 <sup>b</sup><br>(0.052, 0.054)    | 0.059 <sup>b</sup><br>(0.058, 0.061)    | 0.118 <sup>b</sup><br>(0.100, 0.136)    | 0.062 <sup>b</sup><br>(0.058, 0.066)    | 0.028 <sup>b</sup><br>(0.025, 0.031)    | 0.014 <sup>b</sup><br>(0.012, 0.016)    | 0.001<br>(-0.005, 0.006)                |
| Age                                  | 0.015 <sup>b</sup><br>(0.012, 0.018)    | 0.016 <sup>b</sup><br>(0.013, 0.019)    | 0.015 <sup>b</sup><br>(0.012, 0.018)    | -0.023 <sup>c</sup><br>(-0.041, -0.004) | 0.005<br>(-0.002, 0.011)                | 0.014 <sup>b</sup><br>(0.007, 0.020)    | 0.017 <sup>b</sup><br>(0.012, 0.023)    | 0.021 <sup>b</sup><br>(0.013, 0.029)    |
| Age squared                          | -0.000 <sup>b</sup><br>(-0.000, -0.000) | -0.000 <sup>b</sup><br>(-0.000, -0.000) | -0.000 <sup>b</sup><br>(-0.000, -0.000) | 0.000 <sup>d</sup><br>(-0.000, 0.000)   | -0.000 <sup>b</sup><br>(-0.000, -0.000) | -0.000 <sup>b</sup><br>(-0.000, -0.000) | -0.000 <sup>b</sup><br>(-0.000, -0.000) | -0.000 <sup>b</sup><br>(-0.000, -0.000) |
| Men                                  | -0.063 <sup>b</sup><br>(-0.066, -0.060) | -0.060 <sup>b</sup><br>(-0.063, -0.057) | -0.062 <sup>b</sup><br>(-0.065, -0.059) | -0.074 <sup>b</sup><br>(-0.094, -0.055) | -0.063 <sup>b</sup><br>(-0.071, -0.056) | -0.062 <sup>b</sup><br>(-0.068, -0.055) | -0.051 <sup>b</sup><br>(-0.057, -0.046) | -0.047 <sup>b</sup><br>(-0.054, -0.039) |
| White (reference)                    |                                         |                                         |                                         |                                         |                                         |                                         |                                         |                                         |
| Black                                | 0.044 <sup>b</sup><br>(0.036, 0.053)    | 0.044 <sup>b</sup><br>(0.035, 0.052)    | 0.046 <sup>b</sup><br>(0.037, 0.054)    | 0.051 <sup>d</sup><br>(-0.000, 0.102)   | 0.056 <sup>b</sup><br>(0.036, 0.075)    | 0.043 <sup>b</sup><br>(0.024, 0.061)    | 0.042 <sup>b</sup><br>(0.027, 0.057)    | 0.011<br>(-0.012, 0.033)                |
| Other race                           | 0.048 <sup>b</sup><br>(0.040, 0.056)    | 0.045 <sup>b</sup><br>(0.038, 0.053)    | 0.047 <sup>b</sup><br>(0.039, 0.055)    | 0.081 <sup>b</sup><br>(0.030, 0.132)    | 0.071 <sup>b</sup><br>(0.052, 0.091)    | 0.023 <sup>c</sup><br>(0.004, 0.041)    | 0.039 <sup>b</sup><br>(0.026, 0.053)    | 0.043 <sup>b</sup><br>(0.025, 0.060)    |
| Married                              | 0.034 <sup>b</sup><br>(0.031, 0.037)    | 0.035 <sup>b</sup><br>(0.032, 0.038)    | 0.034 <sup>b</sup><br>(0.031, 0.036)    | 0.053 <sup>b</sup><br>(0.034, 0.072)    | 0.046 <sup>b</sup><br>(0.039, 0.052)    | 0.035 <sup>b</sup><br>(0.029, 0.041)    | 0.027 <sup>b</sup><br>(0.022, 0.031)    | 0.025 <sup>b</sup><br>(0.019, 0.032)    |
| ADL score, from 0 to 28              | -0.018 <sup>b</sup><br>(-0.019, -0.018) | -0.019 <sup>b</sup><br>(-0.019, -0.018) | -0.018 <sup>b</sup><br>(-0.018, -0.017) | -0.026 <sup>b</sup><br>(-0.028, -0.024) | -0.020 <sup>b</sup><br>(-0.021, -0.020) | -0.016 <sup>b</sup><br>(-0.017, -0.015) | -0.015 <sup>b</sup><br>(-0.015, -0.014) | -0.014 <sup>b</sup><br>(-0.015, -0.013) |
| BMI ≥ 30 kg/m <sup>2</sup>           | -0.008 <sup>b</sup><br>(-0.012, -0.004) | -0.009 <sup>b</sup><br>(-0.013, -0.006) | -0.010 <sup>b</sup><br>(-0.014, -0.006) | -0.032 <sup>c</sup><br>(-0.060, -0.003) | -0.014 <sup>b</sup><br>(-0.023, -0.005) | -0.007 <sup>d</sup><br>(-0.015, 0.000)  | -0.005<br>(-0.011, 0.002)               | -0.008<br>(-0.017, 0.002)               |
| BMI < 18 kg/m <sup>2</sup>           | -0.032 <sup>b</sup><br>(-0.037, -0.028) | -0.034 <sup>b</sup><br>(-0.038, -0.029) | -0.029 <sup>b</sup><br>(-0.033, -0.024) | -0.024 <sup>d</sup><br>(-0.049, 0.001)  | -0.020 <sup>b</sup><br>(-0.030, -0.009) | -0.040 <sup>b</sup><br>(-0.049, -0.030) | -0.029 <sup>b</sup><br>(-0.037, -0.020) | -0.030 <sup>b</sup><br>(-0.043, -0.016) |
| CPS score=0 (reference)              |                                         |                                         |                                         |                                         |                                         |                                         |                                         |                                         |
| CPS score=1                          | -0.034 <sup>b</sup><br>(-0.038, -0.030) | -0.033 <sup>b</sup><br>(-0.037, -0.029) | -0.029 <sup>b</sup><br>(-0.033, -0.026) | -0.062 <sup>b</sup><br>(-0.093, -0.030) | -0.043 <sup>b</sup><br>(-0.053, -0.034) | -0.033 <sup>b</sup><br>(-0.041, -0.025) | -0.030 <sup>b</sup><br>(-0.036, -0.023) | -0.025 <sup>b</sup><br>(-0.035, -0.015) |
| CPS score=2                          | -0.064 <sup>b</sup><br>(-0.068, -0.060) | -0.060 <sup>b</sup><br>(-0.064, -0.056) | -0.055 <sup>b</sup><br>(-0.059, -0.051) | -0.069 <sup>b</sup><br>(-0.098, -0.040) | -0.077 <sup>b</sup><br>(-0.086, -0.067) | -0.064 <sup>b</sup><br>(-0.072, -0.056) | -0.058 <sup>b</sup><br>(-0.065, -0.051) | -0.056 <sup>b</sup><br>(-0.066, -0.046) |
| CPS score=3                          | -0.116 <sup>b</sup><br>(-0.120, -0.112) | -0.110 <sup>b</sup><br>(-0.114, -0.106) | -0.104 <sup>b</sup><br>(-0.109, -0.100) | -0.049 <sup>b</sup><br>(-0.077, -0.021) | -0.101 <sup>b</sup><br>(-0.111, -0.092) | -0.121 <sup>b</sup><br>(-0.130, -0.112) | -0.117 <sup>b</sup><br>(-0.124, -0.109) | -0.112 <sup>b</sup><br>(-0.124, -0.101) |
| CPS score=4                          | -0.157 <sup>b</sup><br>(-0.165, -0.149) | -0.150 <sup>b</sup><br>(-0.158, -0.142) | -0.144 <sup>b</sup><br>(-0.152, -0.136) | -0.013<br>(-0.053, 0.026)               | -0.120 <sup>b</sup><br>(-0.137, -0.103) | -0.159 <sup>b</sup><br>(-0.177, -0.141) | -0.178 <sup>b</sup><br>(-0.195, -0.162) | -0.160 <sup>b</sup><br>(-0.185, -0.134) |
| CPS score=5                          | -0.161 <sup>b</sup><br>(-0.170, -0.152) | -0.156 <sup>b</sup><br>(-0.165, -0.147) | -0.152 <sup>b</sup><br>(-0.160, -0.143) | -0.02<br>(-0.058, 0.018)                | -0.101 <sup>b</sup><br>(-0.118, -0.083) | -0.192 <sup>b</sup><br>(-0.211, -0.172) | -0.190 <sup>b</sup><br>(-0.209, -0.171) | -0.186 <sup>b</sup><br>(-0.218, -0.154) |
| CPS score=6                          | -0.189 <sup>b</sup><br>(-0.201, -0.177) | -0.189 <sup>b</sup><br>(-0.201, -0.178) | -0.183 <sup>b</sup><br>(-0.194, -0.171) | 0.053 <sup>c</sup><br>(0.009, 0.097)    | -0.096 <sup>b</sup><br>(-0.121, -0.071) | -0.201 <sup>b</sup><br>(-0.234, -0.167) | -0.292 <sup>b</sup><br>(-0.326, -0.257) | -0.289 <sup>b</sup><br>(-0.353, -0.226) |
| Do-not-resuscitate order             | -0.035 <sup>b</sup><br>(-0.038, -0.032) | -0.036 <sup>b</sup><br>(-0.039, -0.033) | -0.034 <sup>b</sup><br>(-0.037, -0.030) | -0.022 <sup>c</sup><br>(-0.043, -0.002) | -0.040 <sup>b</sup><br>(-0.048, -0.032) | -0.033 <sup>b</sup><br>(-0.039, -0.026) | -0.029 <sup>b</sup><br>(-0.035, -0.024) | -0.025 <sup>b</sup><br>(-0.034, -0.016) |

(Continued)

**eTable 3.**  
Continued

| Independent Variables                                   | Dependent Variable=Discharged to Home   |                                         |                                         |                                         |                                         |                                         |                                         |                                         |
|---------------------------------------------------------|-----------------------------------------|-----------------------------------------|-----------------------------------------|-----------------------------------------|-----------------------------------------|-----------------------------------------|-----------------------------------------|-----------------------------------------|
|                                                         | Whole Sample                            | OT                                      | PT                                      | Low                                     | Medium                                  | High                                    | Very High                               | Ultrahigh                               |
| Any ICU use during hospitalization before SNF admission | -0.047 <sup>b</sup><br>(-0.051, -0.044) | -0.047 <sup>b</sup><br>(-0.051, -0.044) | -0.045 <sup>b</sup><br>(-0.048, -0.041) | -0.051 <sup>b</sup><br>(-0.071, -0.030) | -0.042 <sup>b</sup><br>(-0.051, -0.034) | -0.043 <sup>b</sup><br>(-0.051, -0.036) | -0.044 <sup>b</sup><br>(-0.050, -0.037) | -0.043 <sup>b</sup><br>(-0.052, -0.034) |
| Devo-Charlson Comorbidity Index during hospitalization  | -0.017 <sup>b</sup><br>(-0.018, -0.016) | -0.018 <sup>b</sup><br>(-0.019, -0.017) | -0.016 <sup>b</sup><br>(-0.017, -0.015) | -0.014 <sup>b</sup><br>(-0.020, -0.008) | -0.017 <sup>b</sup><br>(-0.019, -0.014) | -0.015 <sup>b</sup><br>(-0.017, -0.013) | -0.016 <sup>b</sup><br>(-0.017, -0.014) | -0.013 <sup>b</sup><br>(-0.016, -0.010) |
| No. of physician visits in preceding 14 d               | -0.006 <sup>b</sup><br>(-0.007, -0.004) | -0.004 <sup>b</sup><br>(-0.005, -0.002) | -0.006 <sup>b</sup><br>(-0.007, -0.004) | -0.005<br>(-0.011, 0.002)               | -0.007 <sup>b</sup><br>(-0.010, -0.004) | -0.008 <sup>b</sup><br>(-0.011, -0.006) | -0.002 <sup>c</sup><br>(-0.005, -0.000) | -0.003 <sup>c</sup><br>(-0.007, -0.000) |
| No. of medications received                             | -0.004 <sup>b</sup><br>(-0.004, -0.004) | -0.004 <sup>b</sup><br>(-0.004, -0.004) | -0.004 <sup>b</sup><br>(-0.004, -0.004) | -0.006 <sup>b</sup><br>(-0.008, -0.004) | -0.005 <sup>b</sup><br>(-0.006, -0.004) | -0.005 <sup>b</sup><br>(-0.006, -0.004) | -0.004 <sup>b</sup><br>(-0.004, -0.003) | -0.004 <sup>b</sup><br>(-0.005, -0.003) |
| Receiving antipsychotic or hypnotic medications         | -0.004 <sup>b</sup><br>(-0.007, -0.001) | -0.004 <sup>b</sup><br>(-0.007, -0.001) | -0.005 <sup>b</sup><br>(-0.008, -0.002) | -0.006<br>(-0.026, 0.013)               | -0.002<br>(-0.009, 0.006)               | -0.005<br>(-0.011, 0.002)               | -0.002<br>(-0.008, 0.003)               | -0.003<br>(-0.011, 0.005)               |
| Occupancy rate                                          | 0.002<br>(-0.013, 0.017)                | 0.005<br>(-0.010, 0.020)                | 0.003<br>(-0.012, 0.018)                | -0.05<br>(-0.133, 0.033)                | 0.005<br>(-0.026, 0.036)                | 0.012<br>(-0.017, 0.041)                | 0.003<br>(-0.022, 0.028)                | 0.017<br>(-0.025, 0.059)                |
| Any physician extender                                  | -0.001<br>(-0.005, 0.004)               | -0.001<br>(-0.005, 0.004)               | 0<br>(-0.004, 0.005)                    | 0.005<br>(-0.027, 0.037)                | -0.002<br>(-0.013, 0.010)               | -0.002<br>(-0.012, 0.008)               | 0.001<br>(-0.006, 0.009)                | -0.006<br>(-0.016, 0.005)               |
| Ratio of registered nurses to total nurses              | 0.011<br>(-0.004, 0.027)                | 0.007<br>(-0.008, 0.023)                | 0.012<br>(-0.004, 0.027)                | -0.038<br>(-0.138, 0.063)               | 0.043 <sup>c</sup><br>(0.006, 0.079)    | 0<br>(-0.031, 0.031)                    | 0.018<br>(-0.008, 0.043)                | -0.013<br>(-0.054, 0.028)               |
| Percentage of residents on Medicaid                     | -0.000 <sup>d</sup><br>(-0.000, 0.000)  | -0.000 <sup>d</sup><br>(-0.000, 0.000)  | -0.000 <sup>c</sup><br>(-0.000, -0.000) | 0<br>(-0.002, 0.001)                    | 0<br>(-0.001, 0.000)                    | 0<br>(-0.001, 0.000)                    | 0<br>(-0.000, 0.000)                    | 0<br>(-0.001, 0.000)                    |
| Percentage of residents on Medicare                     | -0.000 <sup>c</sup><br>(-0.000, -0.000) | -0.000 <sup>d</sup><br>(-0.000, 0.000)  | -0.000 <sup>c</sup><br>(-0.000, -0.000) | 0<br>(-0.001, 0.001)                    | -0.000 <sup>c</sup><br>(-0.001, -0.000) | 0<br>(-0.001, 0.000)                    | 0<br>(-0.000, 0.000)                    | 0<br>(-0.001, 0.000)                    |
| Total no. of physical therapists per 100 beds           | 0.000 <sup>b</sup><br>(0.000, 0.000)    | 0.000 <sup>b</sup><br>(0.000, 0.000)    | 0.000 <sup>b</sup><br>(0.000, 0.000)    | 0<br>(-0.002, 0.002)                    | 0<br>(-0.000, 0.000)                    | 0<br>(-0.000, 0.000)                    | 0<br>(-0.000, 0.000)                    | 0<br>(-0.000, 0.000)                    |
| Total no. of occupational therapists per 100 beds       | -0.000 <sup>b</sup><br>(-0.000, -0.000) | -0.000 <sup>b</sup><br>(-0.000, -0.000) | -0.000 <sup>d</sup><br>(-0.000, 0.000)  | 0<br>(-0.002, 0.002)                    | 0<br>(-0.000, 0.000)                    | 0<br>(-0.001, 0.000)                    | -0.000 <sup>c</sup><br>(-0.000, -0.000) | 0<br>(-0.000, 0.000)                    |
| Total no. of speech therapists per 100 beds             | -0.000 <sup>b</sup><br>(-0.001, -0.000) | -0.000<br>(-0.000, 0.000)               | -0.000 <sup>c</sup><br>(-0.000, -0.000) | 0.002<br>(-0.002, 0.005)                | 0<br>(-0.001, 0.000)                    | 0<br>(-0.001, 0.000)                    | 0<br>(-0.000, 0.001)                    | 0.001<br>(-0.001, 0.002)                |
| Constant                                                | 0.554 <sup>b</sup><br>(0.432, 0.676)    | 0.541 <sup>b</sup><br>(0.419, 0.663)    | 0.500 <sup>b</sup><br>(0.378, 0.622)    | 2.120 <sup>b</sup><br>(1.344, 2.896)    | 0.953 <sup>b</sup><br>(0.674, 1.231)    | 0.628 <sup>b</sup><br>(0.366, 0.889)    | 0.452 <sup>b</sup><br>(0.234, 0.670)    | 0.420 <sup>c</sup><br>(0.093, 0.747)    |
| Observations                                            | 463,003                                 | 463,389                                 | 463,446                                 | 24,059                                  | 109,926                                 | 117,030                                 | 141,446                                 | 62,619                                  |

<sup>a</sup> Full list of regression estimates. Values in parentheses are robust confidence intervals. All models were adjusted for patient characteristics and time-varying facility characteristics. Details of the variables are described in the text. Nursing home and year-quarter fixed effects were used in all models. Minimum minutes per week for the Resource Utilization Group (RUG) categories were as follows: low (45 minutes), medium (150 minutes), high (325 minutes), very high (500 minutes), and ultrahigh (720 minutes). SNFs=skilled nursing facilities, OT=occupational therapy, PT=physical therapy, ADL=activities of daily living, BMI=body mass index, CPS=Cognitive Performance Scale, ICU=intensive care unit.  
<sup>b</sup> P<.01.  
<sup>c</sup> P<.05.  
<sup>d</sup> P<.1.
